# THE JOURNAL OF NEUROPSYCHIATRY and Clinical Neurosciences

The Official Journal of the American Neuropsychiatric Association

## In this issue:

- Recent Neuroimaging Techniques in Mild Traumatic Brain Injury
- Cumulative Exposure to General Anesthetics and Cognitive Dysfunction at Age 75 in the Vienna Transdanube Aging "VITA" Study
- Personality Disorder Symptomatology and Neuropsychological Functioning in Closed Head Injury
- Impact of Frontal Systems Behavioral Functioning in Dementia on Caregiver Burden

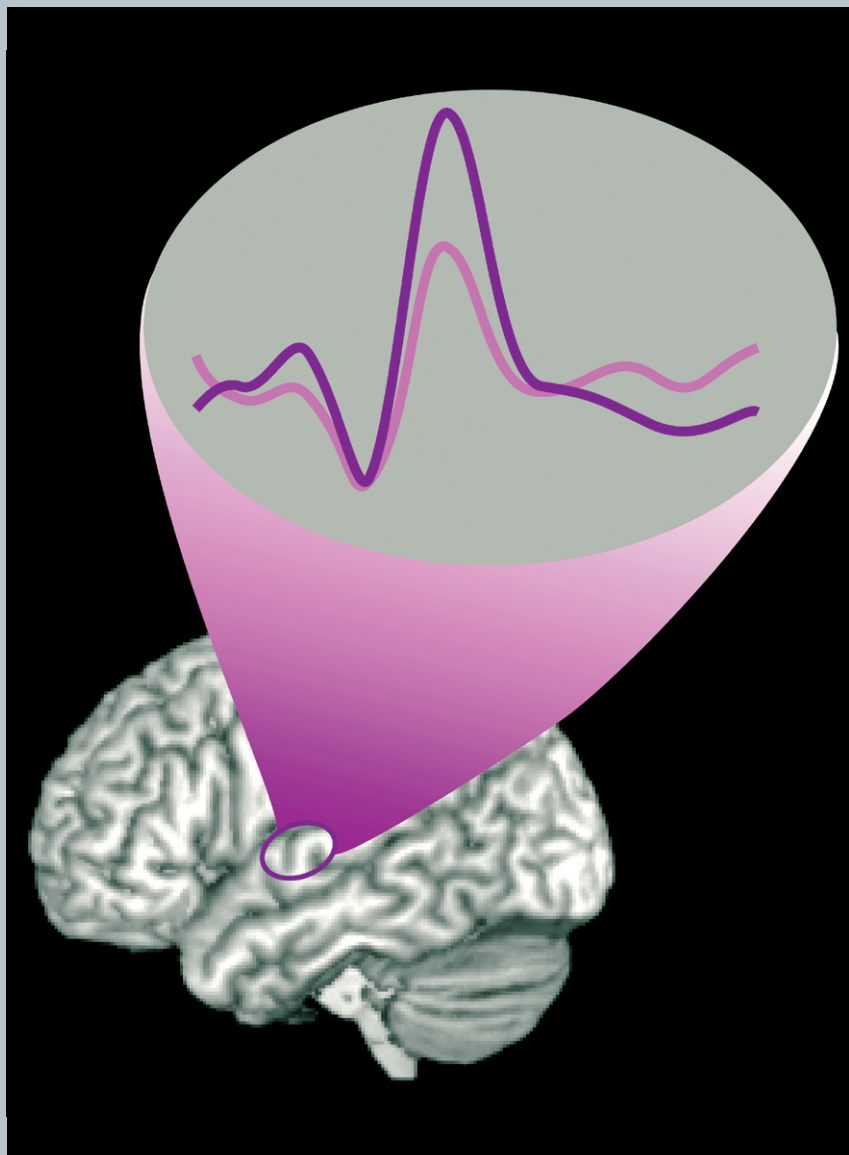

Volume 19 • Number 1 • Winter 2007

Visit our web site at:  
[neuro.psychiatryonline.org](http://neuro.psychiatryonline.org)
