# THE JOURNAL OF NEUROPSYCHIATRY and Clinical Neurosciences

The Official Journal of the American Neuropsychiatric Association

## In this issue:

- Recent Neuroimaging Techniques in Mild Traumatic Brain Injury
- Cumulative Exposure to General Anesthetics and Cognitive Dysfunction at Age 75 in the Vienna Transdanube Aging "VITA" Study
- Personality Disorder Symptomatology and Neuropsychological Functioning in Closed Head Injury
- Impact of Frontal Systems Behavioral Functioning in Dementia on Caregiver Burden

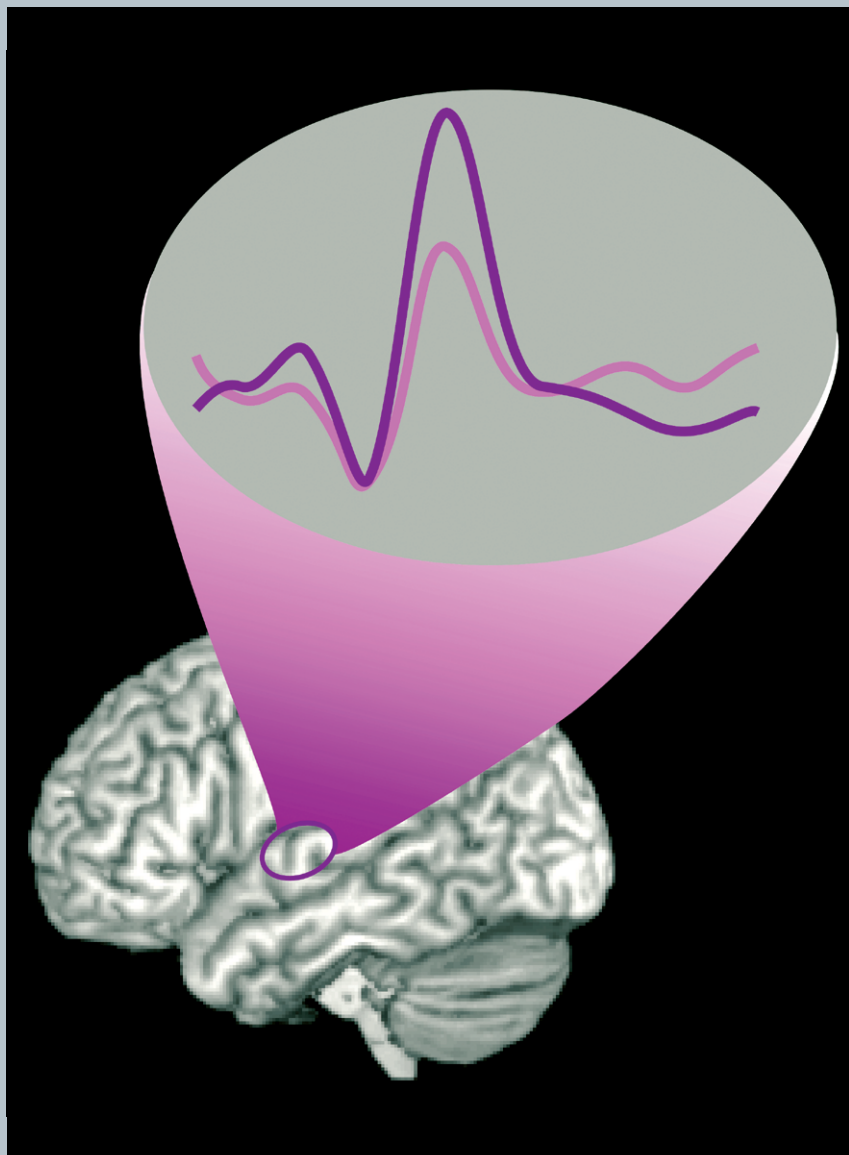

Volume 19 • Number 1 • Winter 2007

Visit our web site at:  
[neuro.psychiatryonline.org](http://neuro.psychiatryonline.org)

# Give your patients the help they deserve with these resources

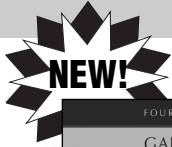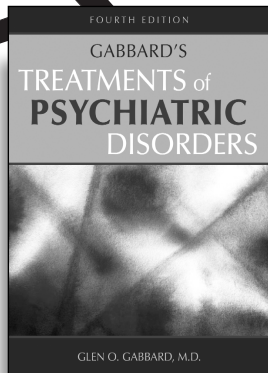

## Gabbard's Treatments of Psychiatric Disorders, Fourth Edition

Edited by Glen O. Gabbard, M.D.

"There is wisdom here for every reader, from the student first encountering persons

with mental illnesses to the experienced psychiatrist looking for something more for a troubling patient."—*Robert Freedman, M.D., Professor of Psychiatry, University of Colorado; Editor-in-Chief, American Journal of Psychiatry, Denver, Colorado*

2007 • pages TBA • ISBN 978-1-58562-216-0 • Hardcover  
\$195.00 • Item #62216

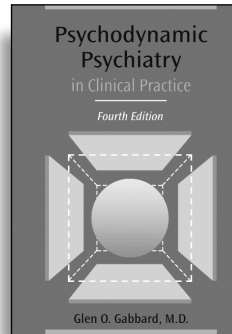

## Psychodynamic Psychiatry in Clinical Practice, Fourth Edition

Glen O. Gabbard, M.D.

This invaluable "one-stop" reference will prepare you to teach students and treat patients more effectively with its truly integra-

tive psychodynamic approach. Drawing on the latest breakthroughs in neuroscience to validate current psychodynamic thinking, the author includes neuroanatomical illustrations that highlight the need to integrate psychoanalytic theories of development with brain development and the impact of environment on gene expression. Clearly organized into three distinct sections based on DSM-IV diagnoses fundamentals, Axis I disorders, Axis II disorders—this best-selling book is the definitive reference for training programs.

2005 • 652 pages • ISBN 978-1-58562-185-9 • Hardcover  
\$97.00 • Item #62185

## The American Psychiatric Publishing Textbook of Schizophrenia

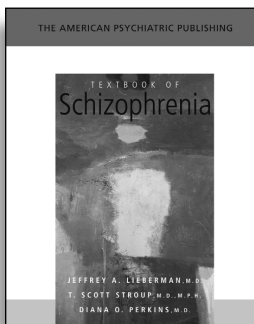

Edited by Jeffrey A. Lieberman, M.D., T. Scott Stroup, M.D., M.P.H., and Diana O. Perkins, M.D., M.P.H.

*The American Psychiatric Publishing Textbook of Schizophrenia* offers broad coverage that encompasses

the current state of knowledge of its cause, nature, and treatment. Experts from North America and Europe address the complexity of schizophrenia in a comprehensive volume that leads readers from historical overview and epidemiology to consideration of comorbid conditions. It covers genetic and environmental causes, describes leading theories of schizophrenia, and explores the involvement of abnormal brain circuitry and the results of the latest neuroimaging studies.

As a guide to clinical practice, the book offers timely and informative guidelines for approaching cognitive impairment as a potential psychopharmacological target for treatment, strategies for improving functioning in individuals with social or vocational impairment, an overview of antipsychotic drugs, and a review of proven psychosocial interventions. Squarely confronting this baffling disease, this textbook will serve as a dependable source of knowledge for students, scientists, and clinicians alike.

2006 • 464 pages • ISBN 978-1-58562-191-9 • Hardcover  
\$100.00 • Item #62191

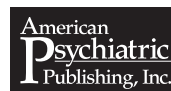

The *First* and *Last* Word in Psychiatry

1000 Wilson Boulevard  
Suite 1825, Arlington, VA 22209-3901  
Phone: 703-907-7322 or 1-800-368-5777

Mon.-Fri., 9 am to 5:30 pm, ET  
Fax: 703-907-1091 | Email: [appi@psych.org](mailto:appi@psych.org)  
**www.appi.org**

PLEASE REFERENCE PRIORITY CODE **AH718** WHEN ORDERING.
